# Supplementary material for: An epigenetic marker panel for recurrence risk prediction of low grade papillary urothelial cell carcinoma (LGPUCC) and its potential use for surveillance after transurethral resection using urine
Source: PubMed Central journal article supplement (PMC4170626; doi:10.18632/oncotarget.2129), 2014-06-23
Supplement: oncotarget-05-5218-s001.pdf [file oncotarget-05-5218-s001.pdf]

## An epigenetic marker panel for recurrence risk prediction of low grade papillary urothelial cell carcinoma (LGPUCC) and its potential use for surveillance after transurethral resection using urine

Supplementary Material

**Sup Table 1: Clinicopathological and molecular characteristics of urine samples from UCC patients tested**

| Study identification | Cytology | Cystoscopy | Recurrence | Grade | CCNA1 | CCND2 | CALCA | Any positive |
|----------------------|----------|------------|------------|-------|-------|-------|-------|--------------|
| 1                    | +        | +          | -          | LGUCC | NA    | -     | -     | -            |
| 2                    | +        | +          | -          | LGUCC | NA    | -     | -     | -            |
| 3                    | +        | +          | -          | LGUCC | NA    | -     | -     | -            |
| 4                    | +        | -          | -          | LGUCC | NA    | -     | -     | -            |
| 5                    | +        | NA         | -          | LGUCC | NA    | -     | +     | +            |
| 6                    | +        | -          | -          | LGUCC | NA    | -     | +     | +            |
| 7                    | +        | +          | +          | LGUCC | NA    | -     | +     | +            |
| 8                    | +        | +          | -          | LGUCC | NA    | -     | -     | -            |
| 9                    | +        | NA         | -          | LGUCC | NA    | -     | -     | -            |
| 10                   | +        | -          | NA         | LGUCC | NA    | +     | +     | +            |
| 11                   | +        | +          | -          | LGUCC | NA    | +     | +     | +            |
| 12                   | +        | +          | -          | LGUCC | NA    | +     | +     | +            |
| 13                   | +        | NA         | -          | LGUCC | NA    | -     | +     | +            |
| 14                   | +        | +          | NA         | LGUCC | NA    | -     | -     | -            |
| 15                   | +        | +          | +          | LGUCC | -     | -     | +     | +            |
| 16                   | +        | +          | +          | LGUCC | NA    | -     | -     | -            |
| 17                   | +        | +          | -          | LGUCC | -     | +     | +     | +            |
| 18                   | +        | +          | -          | LGUCC | +     | +     | +     | +            |
| 19                   | +        | +          | -          | LGUCC | +     | -     | -     | +            |
| 20                   | +        | +          | -          | LGUCC | +     | +     | +     | +            |
| 21                   | +        | -          | -          | LGUCC | -     | +     | +     | +            |
| 22                   | +        | +          | -          | LGUCC | +     | -     | -     | +            |
| 23                   | +        | +          | -          | LGUCC | +     | -     | +     | +            |
| 24                   | +        | +          | -          | LGUCC | -     | -     | +     | +            |
| 25                   | +        | +          | -          | LGUCC | -     | +     | +     | +            |
| 26                   | +        | +          | +          | LGUCC | -     | -     | +     | +            |
| 27                   | +        | +          | -          | LGUCC | -     | -     | -     | -            |
| 28                   | +        | +          | -          | LGUCC | +     | -     | +     | +            |
| 29                   | +        | +          | -          | LGUCC | +     | +     | +     | +            |

|    |   |   |    |       |    |   |   |   |
|----|---|---|----|-------|----|---|---|---|
| 30 | + | + | +  | LGUCC | NA | - | - | - |
| 31 | + | + | -  | LGUCC | +  | - | + | + |
| 32 | + | + | -  | LGUCC | +  | - | + | + |
| 33 | + | - | NA | LGUCC | +  | + | + | + |
| 34 | + | + | -  | LGUCC | -  | - | + | + |
| 35 | + | + | -  | LGUCC | -  | + | + | + |
| 36 | + | + | -  | LGUCC | -  | + | + | + |
| 37 | + | + | -  | LGUCC | -  | + | - | + |
| 38 | + | + | -  | LGUCC | -  | + | + | + |
| 39 | + | + | -  | LGUCC | -  | - | + | + |
| 40 | + | + | -  | LGUCC | -  | + | + | + |
| 41 | - | - | -  | LGUCC | -  | - | + | + |
| 42 | - | + | +  | LGUCC | -  | - | + | + |
| 43 | - | + | -  | LGUCC | -  | - | - | - |
| 44 | - | + | -  | LGUCC | -  | - | + | + |
| 45 | - | + | +  | LGUCC | -  | - | + | + |
| 46 | - | + | +  | LGUCC | -  | - | + | + |
| 47 | - | + | NA | LGUCC | -  | - | + | + |
| 48 | - | - | -  | LGUCC | -  | - | + | + |
| 49 | - | + | -  | LGUCC | +  | - | + | + |
| 50 | - | + | +  | LGUCC | -  | - | - | - |
| 51 | - | + | -  | LGUCC | -  | - | - | - |
| 52 | - | + | -  | LGUCC | +  | - | + | + |
| 53 | - | + | -  | LGUCC | +  | - | - | + |
| 54 | - | - | +  | LGUCC | +  | - | + | + |
| 55 | - | + | +  | LGUCC | +  | + | + | + |
| 56 | - | + | +  | LGUCC | +  | - | + | + |
| 57 | - | + | -  | LGUCC | -  | - | - | - |
| 58 | - | + | -  | LGUCC | +  | + | + | + |
| 59 | - | + | -  | LGUCC | -  | - | - | - |
| 60 | - | + | -  | LGUCC | +  | + | + | + |
| 61 | - | + | -  | LGUCC | +  | - | + | + |
| 62 | - | + | -  | LGUCC | +  | - | + | + |
| 63 | - | + | -  | LGUCC | +  | - | + | + |
| 64 | - | + | -  | LGUCC | -  | - | + | + |
| 65 | - | + | -  | LGUCC | -  | - | + | + |
| 66 | - | + | -  | LGUCC | +  | + | + | + |
| 67 | - | + | -  | LGUCC | NA | - | + | + |
| 68 | - | + | -  | LGUCC | NA | + | + | + |
| 69 | - | + | -  | LGUCC | NA | + | + | + |
| 70 | - | + | -  | LGUCC | NA | + | + | + |

|     |    |    |    |       |    |   |   |   |
|-----|----|----|----|-------|----|---|---|---|
| 71  | NA | NA | NA | NA    | NA | - | + | + |
| 72  | NA | +  | NA | LGUCC | NA | - | - | - |
| 73  | NA | NA | NA | NA    | NA | - | - | - |
| 74  | NA | +  | -  | LGUCC | NA | + | + | + |
| 75  | NA | +  | +  | HGUCC | NA | - | - | - |
| 76  | -  | -  | +  | HGUCC | NA | - | - | - |
| 77  | -  | -  | +  | HGUCC | NA | - | - | - |
| 78  | NA | NA | NA | NA    | NA | - | + | + |
| 79  | NA | NA | NA | NA    | NA | - | + | + |
| 80  | NA | NA | NA | NA    | NA | - | - | - |
| 81  | NA | NA | NA | NA    | NA | + | + | + |
| 82  | -  | -  | -  | NA    | NA | - | + | + |
| 83  | NA | NA | NA | NA    | NA | - | + | + |
| 84  | NA | NA | NA | NA    | NA | - | + | + |
| 85  | NA | NA | NA | NA    | NA | - | - | - |
| 86  | NA | NA | NA | NA    | NA | - | - | - |
| 87  | -  | +  | +  | HGUCC | NA | - | - | - |
| 88  | NA | +  | -  | LGUCC | +  | + | - | + |
| 89  | -  | +  | +  | HGUCC | +  | + | - | - |
| 90  | NA | NA | NA | NA    | -  | - | - | - |
| 91  | +  | -  | +  | HGUCC | -  | - | - | - |
| 92  | NA | NA | NA | HGUCC | NA | - | - | - |
| 93  | NA | NA | NA | LGUCC | NA | - | + | + |
| 94  | NA | NA | NA | NA    | NA | - | - | - |
| 95  | -  | 1  | 1  | HGUCC | NA | - | + | + |
| 96  | NA | NA | NA | LGUCC | +  | - | + | + |
| 97  | +  | +  | -  | HGUCC | -  | - | - | - |
| 98  | NA | NA | NA | NA    | +  | - | - | + |
| 99  | -  | +  | -  | HGUCC | -  | - | - | - |
| 100 | -  | +  | -  | HGUCC | +  | - | - | + |
| 101 | NA | NA | NA | HGUCC | -  | - | + | + |
| 102 | NA | NA | NA | LGUCC | +  | - | + | + |
| 103 | NA | +  | -  | LGUCC | -  | + | + | + |
| 104 | NA | NA | NA | NA    | +  | - | - | + |
| 105 | 2  | 2  | 2  | HGUCC | -  | - | - | - |
| 106 | NA | NA | NA | LGUCC | -  | - | - | - |
| 107 | NA | NA | NA | NA    | NA | - | + | + |
| 108 | NA | NA | NA | NA    | NA | - | - | - |
| 109 | NA | NA | NA | NA    | +  | - | + | + |
| 110 | -  | +  | +  | HGUCC | -  | - | + | + |
| 111 | -  | +  | -  | HGUCC | -  | - | + | + |

|     |    |    |    |       |    |   |   |   |
|-----|----|----|----|-------|----|---|---|---|
| 112 | NA | NA | NA | HGUCC | +  | + | + | + |
| 113 | -  | +  | -  | HGUCC | -  | - | - | - |
| 114 | NA | NA | NA | NA    | +  | - | + | + |
| 115 | NA | NA | NA | NA    | +  | - | - | + |
| 116 | NA | +  | -  | LGUCC | -  | - | + | + |
| 117 | NA | +  | +  | LGUCC | -  | - | + | + |
| 118 | NA | +  | -  | LGUCC | +  | + | + | + |
| 119 | NA | +  | -  | LGUCC | +  | - | + | + |
| 120 | 1  | +  | +  | HGUCC | -  | - | - | - |
| 121 | NA | -  | -  | HGUCC | +  | - | - | + |
| 122 | NA | NA | NA | LGUCC | -  | - | - | - |
| 123 | NA | -  | -  | LGUCC | -  | + | + | + |
| 124 | NA | +  | -  | LGUCC | NA | + | + | + |
| 125 | NA | +  | -  | LGUCC | NA | - | + | + |
| 126 | NA | +  | -  | HGUCC | +  | + | + | + |
| 127 | NA | +  | -  | LGUCC | +  | - | + | + |
| 128 | NA | -  | -  | LGUCC | -  | + | + | + |
| 129 | NA | -  | -  | HGUCC | -  | - | - | - |
| 130 | NA | -  | -  | LGUCC | -  | + | + | + |
| 131 | NA | NA | NA | HGUCC | -  | + | + | + |
| 132 | NA | NA | NA | LGUCC | +  | + | + | + |
| 133 | NA | NA | NA | LGUCC | +  | - | - | - |
| 134 | NA | +  | -  | LGUCC | -  | - | + | + |
| 135 | NA | -  | -  | LGUCC | NA | - | - | - |
| 136 | -  | -  | -  | HGUCC | NA | - | + | + |
| 137 | NA | -  | -  | LGUCC | NA | - | + | + |
| 138 | NA | +  | -  | LGUCC | NA | + | + | + |
| 139 | NA | -  | -  | LGUCC | NA | - | + | + |
| 140 | NA | +  | -  | LGUCC | NA | - | + | + |
| 141 | NA | +  | -  | LGUCC | NA | + | + | + |
| 142 | NA | +  | -  | LGUCC | NA | + | + | + |
| 143 | NA | NA |    | NA    | NA | - | - | - |
| 144 | +  | +  | +  | HGUCC | NA | - | - | - |
| 145 | NA | +  | -  | HGUCC | NA | - | - | - |
| 146 | NA | NA | NA | NA    | NA | - | - | - |
| 147 | -  | +  | +  | HGUCC | NA | - | - | - |
| 148 | NA | +  | -  | LGUCC | +  | - | + | + |

---

NA, sample/data was not available

**Supplemental Table 2.**

| <b>A. Primers and probes sequences and annealing temperatures (T°C) used for QMSP.</b> |                                 |                                          |                                 |            |
|----------------------------------------------------------------------------------------|---------------------------------|------------------------------------------|---------------------------------|------------|
| <b>Gene</b>                                                                            | <b>Forward 5'-3' (primer)</b>   | <b>Probe 5'-3' (6-FAM-5'-3'-6-TAMRA)</b> | <b>Reverse 5'-3' (primer)</b>   | <b>T°C</b> |
| <i>βActin</i>                                                                          | TGGTGATGGAGGAGGT<br>TTAGTAAGT   | ACCACCACCCAACACACA<br>ATAACAAACACA       | AACCAATAAAACCTAC<br>TCCTCCCTTAA | 60         |
| <i>AIM1</i>                                                                            | CGCGGGTATTGGATGTT<br>AGT        | GGGAGCGTTGCGGATTAT<br>TCGTAG             | CCGACCCACCTATACG<br>AAAA        | 60         |
| <i>ARF</i>                                                                             | ACGGGCGTTTTTCGGTAG<br>TT        | CGACTCTAAACCCTACGC<br>ACGCGAAA           | CCGAACCTCCAAAATC<br>TCGA        | 60         |
| <i>CALCA</i>                                                                           | GTTTTGGAAGTATGAG<br>GGTGACG     | ATTCCGCCAATACACAAC<br>AACCAATAAACG       | TTCCC GCCGCTATAAA<br>TCG        | 60         |
| <i>CCNA1</i>                                                                           | TCGCGGCGAGTTTATTC<br>G          | CGTTATGGCGATGCGGTT<br>TCGG               | CCGACCGCGACAAACG                | 60         |
| <i>CCND2</i>                                                                           | TTTGATTTAAGGATGCG<br>TTAGAGTACG | AATCCGCCAACACGATCG<br>ACCCTA             | ACTTTCTCCCTAAAAA<br>CCGACTACG   | 60         |
| <i>NID2</i>                                                                            | GCGGTTTTTAAGGAGTT<br>TTATTTTC   | ACGCCGCTACCCCAAACC<br>TTACGA             | CTACGAAATTCCCTTT<br>ACGCT       | 60         |
| <i>RARβ2</i>                                                                           | GGGATTAGAATTTTTTA<br>TGCGAGTTGT | TGTCGAGAACGCGAGCGA<br>TTCG               | TACCCCGACGATACCC<br>AAAC        | 60         |
| <i>TIMP3</i>                                                                           | GCGTCGGAGGTTAAGG<br>TTGTT       | AACTCGCTCGCCGCCGA<br>A                   | CTCTCCAAAATTACCG<br>TACGCG      | 62         |

**B. Primers sequences and annealing temperatures (T°C) used for Quantitative real-time RT-PCR.**

| <b>Gene</b>  | <b>Forward 5'-3' (primer)</b> | <b>Reverse 5'-3' (primer)</b> | <b>T°C</b> |
|--------------|-------------------------------|-------------------------------|------------|
| <i>GAPDH</i> | CGTCTTCACCACCATGG<br>AGA      | CGGCCATCACGCCACAGT<br>TT      | 58         |
| <i>CCNA1</i> | CTCCTGTCTGGTGGGAG<br>GA       | TCAGGTGTTATTCTGGATC<br>AG     | 58         |
| <i>CCND2</i> | CGCAAGCATGCTCAGA<br>CCTT      | CCACCGTCGATGATCGCA            | 58         |
